# Supplementary material
Source: PubMed Central journal article supplement (PMC6932936)
Supplement: BPH-176-4537-s001.pdf [file BPH-176-4537-s001.pdf]

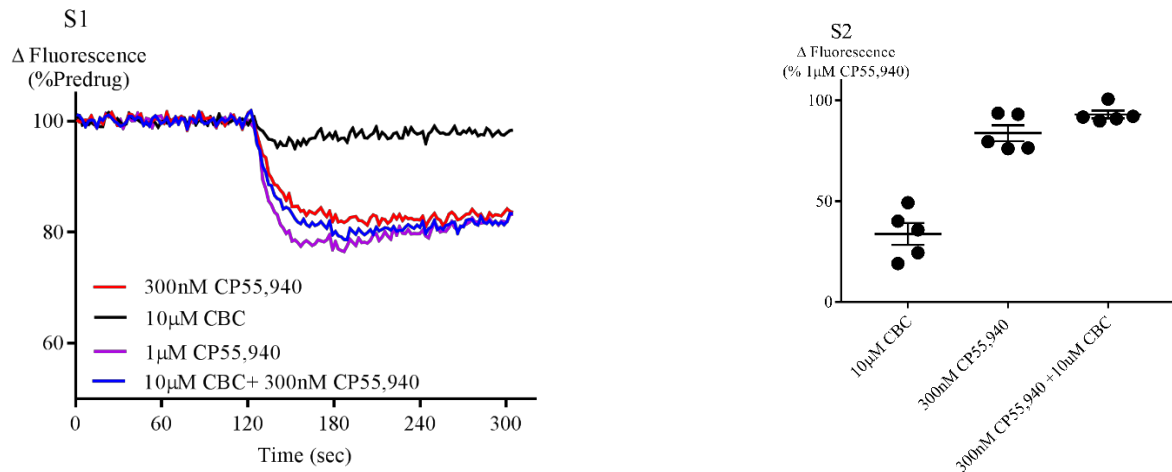

**Figure S1-S2. CBC does not significantly influence CP55,940 activation of CB2 receptors, when co-administered.** S1. Representative traces of changes in fluorescence, due to CBC (10μM), CP55,940 (300nM) and their mixture induced hyperpolarisation in AtT20 CB2 cells. Drugs were added after 120sec of baseline reading and read over 300sec. S2: Summary data of the mixture of CBC (10μM), CP55,940 (300nM) and their mixture in AtT20 CB2 cells. Results are expressed as mean ± SEM after normalisation to 1 μM CP55,940 hyperpolarisation.

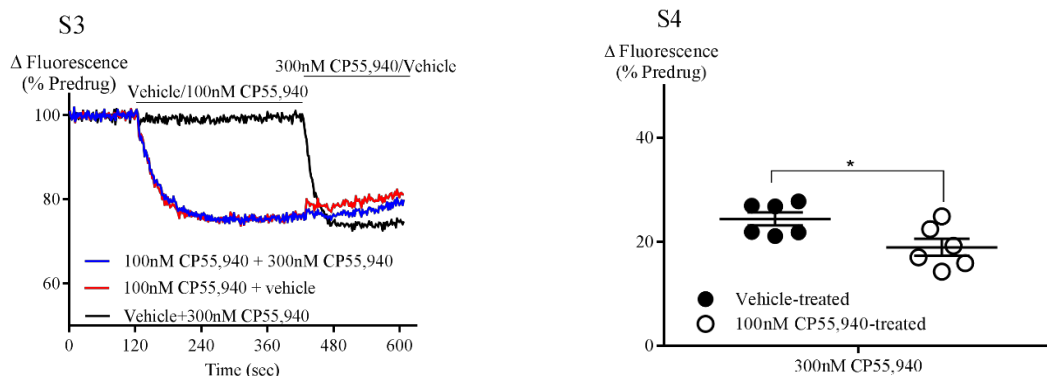

**Figure S3-S4. CB2 receptors are desensitised at 5min of agonist stimulation.** S3 Representative traces of changes in fluorescence, due to 300nM CP55,940 hyperpolarisation after pre-treatment with 100nM CP55940 in AtT20 CB2 cells. After 2mins baseline reading, cells were pre-treated with vehicle or 100nM CP55,940 for 5 mins, followed by addition of 300nM CP55,940. S4 Summary data of the effect of 100nM CP55,940 on 300nM CP55,940 in AtT20-CB2 cells. Results are expressed as mean ± SEM after normalization to 1 μM CP55,940 hyperpolarisation.
